# Supplementary material
Source: PubMed Central journal article supplement (PMC9243196)
Supplement: NIHMS1795376-supplement-1.pdf [file NIHMS1795376-supplement-1.pdf]

Table S1. Demographics and clinical characteristics of person-visits, stratified by self- or parental-reported race. Median [interquartile range] or n (%).

| Variable                                    | Self-reported Black race<br>n=366 person-visits from<br>153 participants | Self-reported Black, mixed race<br>n=107 person-visits from<br>37 participants | Self-reported Caucasian race<br>n=1613 person-visits from<br>570 participants | Self-reported other race<br>n=284 person-visits from<br>105 participants |
|---------------------------------------------|--------------------------------------------------------------------------|--------------------------------------------------------------------------------|-------------------------------------------------------------------------------|--------------------------------------------------------------------------|
| <i>Demographics</i>                         |                                                                          |                                                                                |                                                                               |                                                                          |
| Male                                        | 263 (71.9%)                                                              | 50 (46.7%)                                                                     | 993 (61.6%)                                                                   | 170 (59.9%)                                                              |
| Age, years                                  | 13.4 [9.5, 16.2]                                                         | 13.1 [9.8, 16.4]                                                               | 13.0 [9.2, 16.2]                                                              | 13.5 [9.5, 16.7]                                                         |
| Age < 6y                                    | 40 (10.9%)                                                               | 6 (5.6%)                                                                       | 158 (9.8%)                                                                    | 27 (9.5%)                                                                |
| Age 6 to <12                                | 104 (28.4%)                                                              | 40 (37.4%)                                                                     | 551 (34.2%)                                                                   | 80 (28.2%)                                                               |
| Age 12 to <18                               | 175 (47.8%)                                                              | 47 (43.9%)                                                                     | 710 (44%)                                                                     | 134 (47.2%)                                                              |
| Age ≥ 18y                                   | 47 (12.8%)                                                               | 14 (13.1%)                                                                     | 194 (12%)                                                                     | 43 (15.1%)                                                               |
| <i>Body size</i>                            |                                                                          |                                                                                |                                                                               |                                                                          |
| Height, cm                                  | 154 [131, 167]                                                           | 152 [133, 163]                                                                 | 150 [130, 165]                                                                | 151 [133, 166.2]                                                         |
| Weight, kg                                  | 54.0 [29.8, 73.5]                                                        | 47.2 [30.3, 60.2]                                                              | 44.6 [28.4, 60.9]                                                             | 48.9 [29.7, 65.2]                                                        |
| Body mass index, kg/m <sup>2</sup>          | 21.3 [17.2, 27.2]                                                        | 20.0 [15.7, 23.1]                                                              | 19.1 [16.7, 23.0]                                                             | 20.1 [17.1, 24.3]                                                        |
| Body surface area, m <sup>2</sup>           | 1.52 [1.04, 1.86]                                                        | 1.42 [1.06, 1.66]                                                              | 1.36 [1.01, 1.68]                                                             | 1.44 [1.06, 1.72]                                                        |
| Estimated LBM without Black coefficient, kg | 32.3 [19.9, 46.2]                                                        | 28.7 [19.6, 39.7]                                                              | 28.8 [19.7, 39.8]                                                             | 30.9 [20.3, 41.7]                                                        |
| Estimated LBM with Black coefficient, kg    | 32.8 [20.2, 46.8]                                                        | 29.2 [19.8, 40.2]                                                              | 28.5 [19.6, 39.3]                                                             | 30.4 [20.0, 41.4]                                                        |
| <i>Socioeconomic</i>                        |                                                                          |                                                                                |                                                                               |                                                                          |
| Income < \$36,000                           | 244 (66.7%)                                                              | 66 (61.7%)                                                                     | 488 (30.3%)                                                                   | 141 (50.9%)                                                              |
| Income \$36,000 to \$75,000                 | 89 (24.3%)                                                               | 22 (20.6%)                                                                     | 514 (31.9%)                                                                   | 79 (28.5%)                                                               |
| Income ≥ \$75,000                           | 33 (9%)                                                                  | 19 (17.8%)                                                                     | 611 (37.9%)                                                                   | 57 (20.6%)                                                               |
| Maternal education less than college        | 297 (81.1%)                                                              | 67 (62.6%)                                                                     | 1024 (63.5%)                                                                  | 196 (70.8%)                                                              |
| <i>Kidney disease</i>                       |                                                                          |                                                                                |                                                                               |                                                                          |
| Glomerular diagnosis                        | 144 (39.3%)                                                              | 26 (24.3%)                                                                     | 345 (21.4%)                                                                   | 98 (34.5%)                                                               |
| Serum creatinine, mg/dL                     | 1.2 [0.9, 1.8]                                                           | 1.2 [0.9, 1.4]                                                                 | 1.2 [0.9, 1.8]                                                                | 1.2 [0.9, 1.7]                                                           |
| Serum cystatin c, mg/dL                     | 1.5 [1.1, 2.1]                                                           | 1.4 [1.1, 1.8]                                                                 | 1.7 [1.4, 2.5]                                                                | 1.7 [1.4, 2.5]                                                           |
| Iohexol GFR, ml/min/1.73m <sup>2</sup>      | 52.0 [36.7, 73.8]                                                        | 54.2 [42.6, 70.3]                                                              | 45.7 [33.4, 61.7]                                                             | 48.5 [32.1, 62.6]                                                        |

Table S2. Description of missing data for key covariates among children with measured iohexol GFR, serum creatinine and serum cystatin C data.

| variable           | Age < 6y            |                     | ≥6 to <12 years      |                     | ≥12 to <18 years     |                     | ≥18 years           |                     |
|--------------------|---------------------|---------------------|----------------------|---------------------|----------------------|---------------------|---------------------|---------------------|
|                    | Black race<br>n= 46 | Non-Black<br>n= 185 | Black race<br>n= 144 | Non-Black<br>n= 631 | Black race<br>n= 223 | Non-Black<br>n= 843 | Black race<br>n= 61 | Non-Black<br>n= 237 |
| Sex                | 0% (0)              | 0% (0)              | 0% (0)               | 0% (0)              | 0% (0)               | 0% (0)              | 0% (0)              | 0% (0)              |
| Tanner stage       | NA <sup>a</sup>     | NA <sup>a</sup>     | 4.9% (7)             | 4.6% (29)           | 6.8% (15)            | 7.3% (62)           | NA <sup>a</sup>     | NA <sup>a</sup>     |
| Height             | 0% (0)              | 0% (0)              | 0% (0)               | 0% (0)              | 0% (0)               | 0% (0)              | 0% (0)              | 0% (0)              |
| Weight             | 0% (0)              | 0% (0)              | 0% (0)               | 0% (0)              | 0% (0)               | 0% (0)              | 0% (0)              | 0% (0)              |
| Body mass index    | 0% (0)              | 0% (0)              | 0% (0)               | 0% (0)              | 0% (0)               | 0% (0)              | 0% (0)              | 0% (0)              |
| Body surface area  | 0% (0)              | 0% (0)              | 0.7% (1)             | 0% (0)              | 0.9% (2)             | 0.4% (3)            | 0% (0)              | 0% (0)              |
| eLBM               | 9.2% (17)           | 4.3% (2)            | 0.7% (1)             | 0% (0)              | 0.9% (2)             | 0.4% (3)            | NA <sup>b</sup>     | NA <sup>b</sup>     |
| Income             | 0% (0)              | 0% (0)              | 0% (0)               | 0.5% (3)            | 0% (0)               | 0.5% (4)            | 0% (0)              | 0% (0)              |
| Maternal education | 0% (0)              | 0% (0)              | 0% (0)               | 0.5% (3)            | 0% (0)               | 0.5% (4)            | 0% (0)              | 0% (0)              |

Abbreviations: Estimated lean body mass (eLBM).

<sup>a</sup> Tanner stage was not measured for children < 6 years of age, and young adults ≥ 18 years of age.

<sup>b</sup> Estimated lean body mass was not calculated for young adults because the equation was only validated for pediatric use. Reference: Foster BJ, Platt RW, Zemel BS. Development and validation of a predictive equation for lean body mass in children and adolescents. *Ann Hum Biol.* 2012;39(3):171-182.

doi:10.3109/03014460.2012.681800

Table S3. Sensitivity analysis for overall and age-stratified estimated percent difference in measured GFR between self-reported Black and non-Black participants with adjustment for serum creatinine (in the log scale) and markers of body size, based on linear regression models and restricted to one randomly selected sample per individual. GFR, as the dependent variable, was log transformed and results are expressed as percent difference (95% confidence interval). Estimated lean body mass (eLBM) was calculated for children < 18 years.

| <i>Model</i>                                           | <i>Overall</i><br><i>n= 190 Black</i><br><i>n= 675 non-Black</i> | <i>Age &lt; 6y</i><br><i>n= 20 Black</i><br><i>n= 74 non-Black</i> | <i>≥6 to &lt;12 year</i><br><i>n= 50 Black</i><br><i>n= 212 non-Black</i> | <i>≥12 to &lt;18 y</i><br><i>n= 97 Black</i><br><i>n= 325 non-Black</i> | <i>≥18 y</i><br><i>n= 23 Black</i><br><i>n= 64 non-Black</i> | <i>P-value for differences across ages</i> |
|--------------------------------------------------------|------------------------------------------------------------------|--------------------------------------------------------------------|---------------------------------------------------------------------------|-------------------------------------------------------------------------|--------------------------------------------------------------|--------------------------------------------|
| Unadjusted                                             | <b>+12.8%</b><br><b>(+7.5%, +18.5%)</b>                          | +5.8%<br>(-7.9%, +21.4%)                                           | <b>+9.9%</b><br><b>(+3.7%, +16.5%)</b>                                    | <b>+12.5%</b><br><b>(+6.5%, +18.7%)</b>                                 | +7.4%<br>(-1.6%, +17.1%)                                     | 0.664                                      |
| Sex                                                    | <b>+12.1%</b><br><b>(+6.8%, +17.7%)</b>                          | +4.9%<br>(-8.6%, +20.5%)                                           | <b>+9.3%</b><br><b>(+3.2%, +15.8%)</b>                                    | <b>+10.5%</b><br><b>(+4.8%, +16.5%)</b>                                 | +5.3%<br>(-1.2%, +12.3%)                                     | 0.678                                      |
| Age                                                    | <b>+11.5%</b><br><b>(+7.8%, +15.4%)</b>                          | +5.1%<br>(-4.9%, +16.1%)                                           | <b>+10.8%</b><br><b>(+5.0%, +17.0%)</b>                                   | <b>+14.2%</b><br><b>(+8.6%, 20%)</b>                                    | +8.0%<br>(-0.7%, 17.5%)                                      | 0.564                                      |
| Tanner stage                                           | NA                                                               | NA                                                                 | <b>+10.0%</b><br><b>(+3.7%, +16.7%)</b>                                   | <b>+9.8%</b><br><b>(+4.4%, +15.5%)</b>                                  | NA                                                           | 0.973                                      |
| Height                                                 | <b>+10.5%</b><br><b>(+7.1%, +13.9%)</b>                          | +6.5%<br>(-3.0%, +17%)                                             | <b>+10.2%</b><br><b>(+4.4%, +16.3%)</b>                                   | <b>+10.8%</b><br><b>(+5.9%, +15.9%)</b>                                 | +6.3%<br>(-1.2%, +14.3%)                                     | 0.682                                      |
| Body surface area                                      | <b>+8.7%</b><br><b>(+5.0%, +12.6%)</b>                           | +5.6%<br>(-4.1%, +16.2%)                                           | <b>+11.3%</b><br><b>(+5.2%, +17.8%)</b>                                   | <b>+8.8%</b><br><b>(+3.3%, +14.5%)</b>                                  | +4.0%<br>(-4.9%, 13.6%)                                      | 0.373                                      |
| eLBM with ancestry                                     | <b>+8.9%</b><br><b>(+5.1%, +12.8%)</b>                           | +6.8%<br>(-4.0%, +18.9%)                                           | <b>+10.6%</b><br><b>(+4.6%, +16.9%)</b>                                   | <b>+7.3%</b><br><b>(+2.2%, +12.7%)</b>                                  | NA                                                           | 0.840                                      |
| eLBM without ancestry                                  | <b>+10.0%</b><br><b>(+6.1%, +13.9%)</b>                          | +8.1%<br>(-2.6%, +20.0%)                                           | <b>+11.2%</b><br><b>(+5.2%, +17.6%)</b>                                   | <b>+8.4%</b><br><b>(+3.3%, +13.9%)</b>                                  | NA                                                           | 0.835                                      |
| Sex, age                                               | <b>+10.3%</b><br><b>(+6.7%, +14.1%)</b>                          | +3.7%<br>(-6.4%, 14.8%)                                            | <b>+10.2%</b><br><b>(+4.4%, +16.3%)</b>                                   | <b>+12.2%</b><br><b>(+6.9%, +17.7%)</b>                                 | +5.6%<br>(-0.9%, +12.5%)                                     | 0.585                                      |
| Sex, age, height                                       | <b>+9.8%</b><br><b>(+6.5%, +13.1%)</b>                           | +5.7%<br>(-4.1%, +16.5%)                                           | <b>+9.5%</b><br><b>(+3.8%, +15.6%)</b>                                    | <b>+10.6%</b><br><b>(+5.8%, +15.7%)</b>                                 | +5.5%<br>(-1.0%, +12.4%)                                     | 0.671                                      |
| Sex, age, height, eLBM without ancestry                | <b>+10.8%</b><br><b>(+7.1%, +14.6%)</b>                          | +7.8%<br>(-2.8%, +19.6%)                                           | <b>+9.9%</b><br><b>(+4.2%, +15.9%)</b>                                    | <b>+10.9%</b><br><b>(+6.0%, +16.0%)</b>                                 | NA                                                           | 0.936                                      |
| Sex, age, height, family income and maternal education | <b>+10.8%</b><br><b>(+7.3%, +14.3%)</b>                          | +5.2%<br>(-4.7%, +16.2%)                                           | <b>+10.5%</b><br><b>(+4.4%, +17.0%)</b>                                   | <b>+11.8%</b><br><b>(+6.8%, +17.1%)</b>                                 | <b>+7.7%</b><br><b>(+0.9%, +15.0%)</b>                       | 0.668                                      |

Table S4. Sensitivity analysis for overall and age-stratified estimated percent difference in measured GFR between self-reported Black and non-Black participants with adjustment for serum cystatin c (in the log scale) and markers of body size, based on linear regression models and restricted to one randomly selected sample per individual. GFR, as the dependent variable, was log transformed and results are expressed as percent difference (95% confidence interval). Estimated lean body mass (eLBM) was calculated for children < 18 years.

| <i>Model</i>                                           | <i>Overall</i><br><i>n= 190 Black</i><br><i>n= 675 non-Black</i> | <i>Age &lt; 6y</i><br><i>n= 20 Black</i><br><i>n= 74 non-Black</i> | <i>≥6 to &lt;12 year</i><br><i>n= 50 Black</i><br><i>n= 212 non-Black</i> | <i>≥12 to &lt;18 y</i><br><i>n= 97 Black</i><br><i>n= 325 non-Black</i> | <i>≥18 y</i><br><i>n= 23 Black</i><br><i>n= 64 non-Black</i> | <i>P-value for differences across ages</i> |
|--------------------------------------------------------|------------------------------------------------------------------|--------------------------------------------------------------------|---------------------------------------------------------------------------|-------------------------------------------------------------------------|--------------------------------------------------------------|--------------------------------------------|
| Unadjusted                                             | -2.9%<br>(-6.0%, +0.2%)                                          | <b>-10.5%</b><br><b>(-17.5%, -2.9%)</b>                            | -5.7%<br>(-11.0%, +0.08%)                                                 | -0.7%<br>(-4.9%, 3.8%)                                                  | +1.7%<br>(-7.6%, 11.9%)                                      | 0.125                                      |
| Sex                                                    | <b>-3.8%</b><br><b>(-6.9%, -0.7%)</b>                            | <b>-11.0%</b><br><b>(-17.8%, -3.6%)</b>                            | <b>-5.9%</b><br><b>(-11.3%, -0.2%)</b>                                    | -2.6%<br>(-6.7%, +1.7%)                                                 | +1.3%<br>(-7.7%, +11.3%)                                     | 0.104                                      |
| Age                                                    | -2.9%<br>(-6.0%, +0.3%)                                          | <b>-10.7%</b><br><b>(-17.3%, -3.6%)</b>                            | -5.6%<br>(-11.0%, +0.05%)                                                 | -1.4%<br>(-5.6%, +2.9%)                                                 | +1.3%<br>(-8.3%, +11.7%)                                     | 0.151                                      |
| Tanner stage                                           | NA                                                               | NA                                                                 | <b>-5.9%</b><br><b>(-11.4%, -0.2%)</b>                                    | -1.4%<br>(-5.7%, 3.1%)                                                  | NA                                                           | 0.150                                      |
| Height                                                 | <b>-3.1%</b><br><b>(-6.1%, -0.01%)</b>                           | <b>-10.4%</b><br><b>(-17.0%, -3.2%)</b>                            | -5.5%<br>(-10.8%, +0.1%)                                                  | -0.7%<br>(-5.0%, +3.7%)                                                 | +1.7%<br>(-7.6%, +12.0%)                                     | 0.113                                      |
| Body surface area                                      | -2.9%<br>(-6.0%, +0.2%)                                          | <b>-10.5%</b><br><b>(-17.1%, -3.4%)</b>                            | -4.6%<br>(-10%, +1.1%)                                                    | -0.7%<br>(-5.0%, +3.8%)                                                 | +0.7%<br>(-8.7%, +11.1%)                                     | 0.173                                      |
| eLBM with ancestry                                     | <b>-3.3%</b><br><b>(-6.4%, -0.1%)</b>                            | <b>-9.8%</b><br><b>(-16.9%, -2.0%)</b>                             | -5.0%<br>(-10.4%, +0.7%)                                                  | -1.3%<br>(-5.5%, +3.2%)                                                 | NA                                                           | 0.180                                      |
| eLBM without ancestry                                  | -3.1%<br>(-6.2%, 0.1%)                                           | <b>-9.5%</b><br><b>(-16.7%, -1.7%)</b>                             | -4.7%<br>(-10.1%, +1.0%)                                                  | -1.0%<br>(-5.3%, +3.5%)                                                 | NA                                                           | 0.180                                      |
| Sex, age                                               | <b>-3.8%</b><br><b>(-6.9%, -0.7%)</b>                            | <b>-11.4%</b><br><b>(-17.8%, -4.5%)</b>                            | <b>-5.9%</b><br><b>(-11.3%, -0.2%)</b>                                    | -3.5%<br>(-7.5%, +0.7%)                                                 | +0.7%<br>(-8.6%, +10.8%)                                     | 0.130                                      |
| Sex, age, height                                       | <b>-4.1%</b><br><b>(-7.0%, -1.1%)</b>                            | <b>-11.9%</b><br><b>(-18.3%, -4.9%)</b>                            | <b>-6.1%</b><br><b>(-11.4%, -0.6%)</b>                                    | -3.7%<br>(-7.7%, +0.5%)                                                 | +0.5%<br>(-8.6%, +10.5%)                                     | 0.173                                      |
| Sex, age, height, eLBM without ancestry                | <b>-4.4%</b><br><b>(-7.5%, -1.1%)</b>                            | <b>-10.5%</b><br><b>(-17.3%, -3.2%)</b>                            | -5.4%<br>(-10.7%, +0.1%)                                                  | -3.9%<br>(-8.0%, +0.5%)                                                 | NA                                                           | 0.258                                      |
| Sex, age, height, family income and maternal education | <b>-3.7%</b><br><b>(-6.7%, -0.6%)</b>                            | <b>-12.5%</b><br><b>(-18.7%, -6.0%)</b>                            | <b>-6.7%</b><br><b>(-12.3%, -0.9%)</b>                                    | -2.8%<br>(-6.9%, +1.5%)                                                 | +1.3%<br>(-7.9%, +11.4%)                                     | 0.180                                      |

Table S5. List of principal site investigators of the Chronic Kidney Disease in Children (CKiD) cohort study.

| <b>Study Investigator(s)</b>                                                                | <b>Institution</b>                                          | <b>City</b>  | <b>State/Province</b>    |
|---------------------------------------------------------------------------------------------|-------------------------------------------------------------|--------------|--------------------------|
| Sahar Fathallah-Shaykh, MD                                                                  | University of Alabama at Birmingham (Children's of Alabama) | Birmingham   | AL                       |
| Anjali Nayak, MD; Martin Turman, MD                                                         | Phoenix Children's Hospital                                 | Phoenix      | AZ                       |
| Tom Blydt-Hansen, MD, FRCPC                                                                 | British Columbia Children's Hospital                        | Vancouver    | British Columbia, Canada |
| Cynthia Wong, MD; Steve Alexander, MD                                                       | Stanford University Medical Center                          | Palo Alto    | CA                       |
| Ora Yadin, MD                                                                               | University of California – Los Angeles (UCLA)               | Los Angeles  | CA                       |
| Elizabeth Ingulli, MD; Robert Mak, MD, PhD                                                  | University of California – San Diego (UCSD)                 | San Diego    | CA                       |
| Cheryl Sanchez-Kazi, MD                                                                     | Loma Linda University                                       | Loma Linda   | CA                       |
| Asha Moudgil, MD                                                                            | Children's National Medical Center                          | Washington   | DC                       |
| Caroline Gluck, MD                                                                          | Nemours/Alfred I. duPont Hospital for Children              | Wilmington   | DE                       |
| Carolyn Abitbol, MD; Marissa DeFrietas, MD; Chryso Katsoufis, MD; Wacharee Seeherunvong, MD | University of Miami                                         | Miami        | FL                       |
| Larry Greenbaum, MD, PhD                                                                    | Children's Healthcare of Atlanta / Emory University         | Atlanta      | GA                       |
| Lyndsay Harshman, MD                                                                        | University of Iowa                                          | Iowa City    | IA                       |
| Craig Langman, MD                                                                           | Ann & Robert H. Lurie Children's Hospital of Chicago        | Chicago      | IL                       |
| Sonia Krishnan, MD                                                                          | University of Illinois at Chicago                           | Chicago      | IL                       |
| Amy Wilson, MD                                                                              | Riley Hospital for Children at Indiana University Health    | Indianapolis | IN                       |

|                                                                 |                                                                                      |                 |                  |
|-----------------------------------------------------------------|--------------------------------------------------------------------------------------|-----------------|------------------|
| Stefan Kiessling, MD;<br>Margaret Murphy,<br>PhD                | University of<br>Kentucky                                                            | Lexington       | KY               |
| Siddharth Shah, MD,<br>Janice Sullivan, MD;<br>Sushil Gupta, MD | University of<br>Louisville (Novak<br>Center for Children's<br>Health)               | Louisville      | KY               |
| Samir El-Dahr, MD;<br>Stacy Drury, MD                           | Tulane University                                                                    | New Orleans     | LA               |
| Nancy Rodig, MD                                                 | Boston Children's<br>Hospital                                                        | Boston          | MA               |
| Allison Dart, MD<br>MSc, FRCPC                                  | University of<br>Manitoba (Children's<br>Hospital Research<br>Institute of Manitoba) | Winnipeg        | Manitoba, Canada |
| Meredith Atkinson,<br>MD                                        | Johns Hopkins<br>University (Johns<br>Hopkins Children's<br>Center)                  | Baltimore       | MD               |
| Arlene Gerson, PhD                                              |                                                                                      | Baltimore       | MD               |
| Tej Matoo, MD                                                   | Children's Hospital of<br>Michigan / Wayne<br>State University                       | Detroit         | MI               |
| Zubin Modi, MD                                                  | University of<br>Michigan                                                            | Ann Arbor       | MI               |
| Alejandro Quiroga,<br>MD                                        | Spectrum Health<br>Hospitals / Helen<br>DeVos Children's<br>Hospital                 | Grand Rapids    | MI               |
| Bradley Warady, MD                                              | Children's Mercy<br>Hospital - Kansas<br>City                                        | Kansas City     | MO               |
| Rebecca Johnson,<br>PhD                                         | Children's Mercy<br>Hospital                                                         | Kansas City     | MO               |
| Vikas Dharnidharka,<br>MD                                       | Washington<br>University in St. Louis<br>(St. Louis Children's<br>Hospital)          | St. Louis       | MO               |
| Stephen Hooper,<br>PhD                                          | University of North<br>Carolina                                                      | Chapel Hill     | NC               |
| Susan Massengill,<br>MD                                         | Levine Children's<br>Hospital                                                        | Charlottesville | NC               |
| Liliana Gomez-<br>Mendez, MD                                    | East Carolina<br>University                                                          | Greenville      | NC               |
| Matthew Hand, DO                                                | Dartmouth-Hitchcock<br>Medical Center                                                | Lebanon         | NH               |
| Joann Carlson, MD                                               | Rutgers-Robert<br>Wood Johnson<br>Medical School                                     | New Brunswick   | NJ               |

|                                                    |                                                               |                |                 |
|----------------------------------------------------|---------------------------------------------------------------|----------------|-----------------|
| Hanan Tawadrous, MD; Roberto Jodorkovsky, MD       | St. Joseph's University Medical Center                        | Paterson       | NJ              |
| Craig Wong, MD, MPH                                | University of New Mexico Health Sciences Center               | Albuquerque    | NM              |
| Frederick Kaskel, MD, PhD; Shlomo Shinnar, MD, PhD | Albert Einstein College of Medicine/Montefiore Medical Center | Bronx          | NY              |
| Jeffrey Saland, MD                                 | Icahn School of Medicine at Mount Sinai                       | New York       | NY              |
| Marc Lande, MD; George Schwartz, MD                | University of Rochester Medical Center                        | Rochester      | NY              |
| Anil Mongia, MD                                    | State University of New York, Downstate Medical Center        | Brooklyn       | NY              |
| Donna Claes, MD; Mark Mitsnefes, MD                | Cincinnati Children's Hospital Medical Center                 | Cincinnati     | OH              |
| Katherine Dell, MD                                 | Case Western Reserve University/Cleveland Clinic Children's   | Cleveland      | OH              |
| Hiren Patel, MD                                    | Nationwide Children's Hospital                                | Columbus       | OH              |
| Pascale Lane, MD                                   | Oklahoma University Health Sciences Center                    | Oklahoma City  | OK              |
| Rulan Parekh, MD                                   | Hospital for Sick Children (Sick Kids)                        | Toronto        | Ontario, Canada |
| Amira Al-Uzri, MD, MCR; Kelsey Richardson, MD      | Oregon Health and Science University                          | Portland       | OR              |
| Susan Furth, MD, PhD; Larry Copelovitch, MD        | Children's Hospital of Philadelphia                           | Philadelphia   | PA              |
| Elaine Ku, MD, MAS                                 | University of California – San Francisco (UCSF)               | San Francisco  | SF              |
| Joshua Samuels, MD                                 | University of Texas Health Science Center at Houston          | Houston        | TX              |
| Poyyapakkam Srivaths, MD                           | Baylor College of Medicine (Texas Children's Hospital)        | Houston        | TX              |
| Samhar Al-Akash, MD                                | Driscoll Children's Hospital                                  | Corpus Christi | TX              |

|                        |                                                               |                 |    |
|------------------------|---------------------------------------------------------------|-----------------|----|
| Patricia Seo-Mayer, MD | INOVA Children's Hospital / Pediatric Specialists of Virginia | Fairfax         | VA |
| Victoria Norwood, MD   | University of Virginia                                        | Charlottesville | VA |
| Joseph Flynn, MD       | Seattle Children's Hospital                                   | Seattle         | WA |
| Cynthia Pan, MD        | Medical College of Wisconsin                                  | Milwaukee       | WI |
| Sharon Bartosh, MD     | University of Wisconsin                                       | Madison         | WI |
